1       **Title: Pathogen-derived 9-methyl sphingoid base is perceived by a**  
2                                   **lectin receptor kinase in Arabidopsis**

3       **Authors:** H. Kato<sup>1\*</sup>, K. Nemoto<sup>2</sup>, M. Shimizu<sup>2</sup>, A. Abe<sup>2</sup>, S. Asai<sup>3</sup>, N. Ishihama<sup>3</sup>, T.  
4       Daimon<sup>1</sup>, M. Ojika<sup>5</sup>, K. Kawakita<sup>5</sup>, K. Onai<sup>1</sup>, K. Shirasu<sup>3,4</sup>, M. Ishiura<sup>6</sup>, D. Takemoto<sup>5</sup>,  
5                                   Y. Takano<sup>1</sup>, R. Terauchi<sup>1,2\*</sup>.

6       **Affiliations:**

7       <sup>1</sup>Graduate School of Agriculture, Kyoto University, Kyoto, Japan.

8       <sup>2</sup>Iwate Biotechnology Research Center, Kitakami, Japan.

9       <sup>3</sup>RIKEN Center for Sustainable Resource Science, Yokohama, Japan.

10      <sup>4</sup>Graduate School of Science, The University of Tokyo, Tokyo, Japan.

11      <sup>5</sup>Graduate School of Bioagricultural Sciences, Nagoya University, Nagoya, Japan.

12      <sup>6</sup>Graduate School of Science, Nagoya University, Nagoya, Japan.

13  
14      \*Corresponding authors: [terauchi.ryohei.3z@kyoto-u.ac.jp](mailto:terauchi.ryohei.3z@kyoto-u.ac.jp) (R.T.)

15                                   [kato.hiroaki.6a@kyoto-u.ac.jp](mailto:kato.hiroaki.6a@kyoto-u.ac.jp) (H.K.)

16  
17      **Abstract:**

18      In plants, many invading microbial pathogens are recognized by cell-surface pattern  
19      recognition receptors (PRRs), inducing defense responses; yet how PRRs perceive  
20      pathogen sphingolipids remains unclear. Here, we show that the ceramide Pi-Cer D  
21      from a plant pathogenic oomycete *Phytophthora infestans* triggers defense responses  
22      in Arabidopsis. Pi-Cer D is cleaved by an Arabidopsis apoplastic ceramidase, NCER2,  
23      and the resulting 9-methyl-branched sphingoid base is recognized by a plasma  
24      membrane lectin receptor-like kinase, RDA2. Importantly, 9-methyl-branched  
25      sphingoid base, which is unique to microbes, induces plant immune responses by  
26      interacting with RDA2. Loss of *RDA2* or *NCER2* function compromised Arabidopsis  
27      resistance against an oomycete pathogen, indicating that these are crucial for defense.

1 We provide new insights that help elucidate the recognition mechanisms of pathogen-  
2 derived lipid molecules in plants.

3

4 **One Sentence Summary:** Oomycete-derived ceramide is cleaved into sphingoid base  
5 by ceramidase and recognized by an Arabidopsis receptor kinase.

6

7 **Main Text:**

8 Plant defend themselves against a multitude of microbial pathogens by sensing pathogen  
9 invasion through cell-surface pattern recognition receptors (PRRs) that recognize  
10 microbe- or pathogen-associated molecular patterns (MAMPs, PAMPs) or damage-  
11 associated molecular patterns (DAMPs) of host-derived molecules that emanate from  
12 damage caused by pathogen attack. This recognition then activates immune signaling (*1-*  
13 *3*). The Arabidopsis genome contains genes encoding ~580 PRRs, including ~410  
14 receptor-like kinases (RLKs) and ~170 receptor-like proteins (RLPs) that lack the kinase  
15 domain (*4*). However, molecular interactions between MAMP/PAMPs and PRRs have  
16 been demonstrated only in a limited number of cases, with the majority involving  
17 pathogen peptides, proteins, and carbohydrates. It has recently been reported that lipids  
18 derived from pathogens are also recognized by plant PRRs. The Arabidopsis PRR  
19 LIPOOLIGOSACCHARIDE-SPECIFIC REDUCED ELICITATION recognizes  
20 medium-chain 3-hydroxy fatty acids of bacterial pathogens (*5*), but whether other PRRs  
21 recognize pathogen lipids remains unknown.

22 Ceramides belong to a class of sphingolipids consisting of a sphingoid base and  
23 a fatty acid and are present at high concentrations in eukaryotic cell membranes.  
24 Ceramide and its metabolites are also involved in intracellular signal transduction in  
25 animal cells and plants (*6-7*). Recently, a ceramide-related compound, *Phytophthora*  
26 *infestans* ceramide D (Pi-Cer D; Fig. 1A), from the oomycete pathogen *P. infestans* was  
27 shown to induce immune responses in potato plants (*8*). Pi-Cer D also induced defense  
28 responses in Arabidopsis; therefore, we aimed to identify the Arabidopsis components  
29 involved in the perception of Pi-Cer D in Arabidopsis. For this, we employed Lumi-Map,  
30 a platform consisting of a luciferase (LUC)-based mutant screen and gene identification  
31 (fig. S1) (*9*). Because the Arabidopsis *WRKY33* gene is induced by PAMPs, including

1 flg22, a peptide derived from bacterial flagellin and is required for resistance against  
2 pathogens (10-11), we tested whether Pi-Cer D induced the expression of a *LUC*  
3 transgene driven by the *WRKY33* promoter (p*WRKY33-LUC*) in Arabidopsis, which  
4 resulted in a transient induction of bioluminescence (fig. S2). We then screened 10,000  
5 M<sub>2</sub> seedlings generated by ethylmethanesulfonate (EMS) mutagenesis of the p*WRKY33-*  
6 *LUC* reporter line (W33-1B) for mutants that showed a reduction in bioluminescence  
7 after Pi-Cer D treatment (named Low (L) mutants). We isolated nine mutants insensitive  
8 to Pi-Cer D (L-09, L-12, L-16, L-19, L-31, L-46, L-55, L-66, and L-74) and two mutants  
9 with an extremely low response to Pi-Cer D (L-53 and L-107) (Fig. 1B and fig. S3, Table  
10 S1). These mutants showed normal bioluminescence responses to other PAMPs, such as  
11 flg22, elf18, derived from bacterial elongation factor Tu, and chitin, a component of  
12 fungal cell walls, indicating that they carried lesions affecting the signaling pathway that  
13 is specifically required for the response to Pi-Cer D (Fig. 1C and fig. S4). To identify the  
14 gene(s) altered in these mutants, we performed MutMap analysis (12). All nine Pi-Cer D-  
15 insensitive mutants showed SNP-index peaks on chromosome 1 and contained SNPs  
16 within the gene *At1g11330* encoding a lectin receptor-like kinase *RDA2* (resistant to  
17 DFPM-inhibition of ABA signaling 2) (Fig. 1D, fig. S5, and Table S2), a mutant of which  
18 (*rda2*) is insensitive to a small synthetic molecule [5-(3,4-dichlorophenyl)furan-2-yl]-  
19 piperidine-1-ylmethanethione (DFPM) and incapable to mount DFPM-mediated immune  
20 signaling and inhibition of ABA signaling (13). Thus, we tentatively named the nine Pi-  
21 Cer D-insensitive mutants as *rda2-4* through *rda2-10*. The two Pi-Cer D low-response  
22 mutants showed SNP-index peaks on chromosome 2 and carried mutations in the gene  
23 *At2g38010*, which encodes neutral ceramidase 2 (*NCER2*, Fig. 1E, fig. S5, and Table S2)  
24 (14). We then tentatively named L-53 and L-107 mutants as *ncer2-2* and *ncer2-3*,  
25 respectively. Complementation of the *rda2* and *ncer2* mutant lines by the respective wild-  
26 type alleles restored bioluminescence induction following Pi-Cer D treatment, confirming  
27 that *RDA2* and *NCER2* are the responsible genes for the given phenotypes (Fig. 1F and  
28 fig. S6). Furthermore, T-DNA insertion mutant lines for *RDA2* and *NCER2* showed either  
29 no or reduced induction of *WRKY33* gene expression after Pi-Cer D treatment (fig. S7).  
30 Collectively, these results indicate that *RDA2* and *NCER2* are required for Pi-Cer D  
31 recognition in Arabidopsis. We then asked whether *RDA2* and *NCER2* contribute to  
32 Arabidopsis immunity against an oomycete pathogen *Hyaloperonospora arabidopsidis*.  
33 Importantly, both *rda2* and *ncer2* mutants showed increased susceptibility to *H.*

1 *arabidopsis* (Fig. 1G), indicating that *RDA2* and *NCER2* are required for resistance to  
2 this pathogen.

3 We hypothesized that (i) Pi-Cer D is cleaved by *NCER2* into a mature ligand product  
4 in the apoplastic space and (ii) the ligand is recognized via plasma-membrane-localized  
5 *RDA2*. To test the first hypothesis, we investigated whether the *ncer2* mutant phenotype  
6 was rescued by the product generated by *NCER2* ceramidase treatment of Pi-Cer D (Fig.  
7 2A). The lipid fraction containing Pi-Cer D and *NCER2* produced in *Nicotiana*  
8 *benthamiana*, as well as that containing Pi-Cer D and a mouse ceramidase, induced  
9 p*WRKY33-LUC* bioluminescence in the *ncer2-2* mutant (L-53) (Fig. 2B). We observed  
10 no bioluminescence when we used *NCER2*<sup>G46S</sup>, a mutant version of *NCER2* present in  
11 *ncer2-3* (L-107). These results indicate that Pi-Cer D was cleaved by *NCER2*-encoded  
12 ceramidase and the resulting compound was recognized by *RDA2*. The predicted  
13 molecular size of *NCER2* tagged with hemagglutinin (HA-*NCER2*) was 82 kDa; however,  
14 the protein detected by immunoblot analysis using anti-HA antibody was 26 kDa (fig.  
15 S8). Upon purifying the HA-*NCER2* protein and subjected it to gel electrophoresis, we  
16 recovered two protein bands (26 kDa and 56 kDa) (fig. S8). Analysis of the bands by  
17 liquid chromatography-tandem mass spectrometry (LC-MS/MS) revealed that they  
18 corresponded to the N- and C-terminal regions of *NCER2* (Table S3), respectively. These  
19 results indicate that *NCER2* is processed into its N- and C-terminal regions, which  
20 function together. To investigate the localization of *NCER2*, we then generated transgenic  
21 *Arabidopsis ncer2-2* mutant lines that expressed HA-*NCER2* driven by its own promoter  
22 (*ncer2-2 HA-NCER2*) (fig. S9). We detected the HA-*NCER2* protein in the apoplast wash  
23 fluid (AWF) of these lines (Fig. 2D) and found that *WRKY33-LUC* activity was induced  
24 in the AWF from the wild-type reporter line and *ncer2-2 HA-NCER2* lines, but not in that  
25 from the *ncer2-2* mutant (Fig. 2C). These results indicate that *NCER2* localized to the  
26 apoplast and metabolizes Pi-Cer D into a mature ligand product that is recognized by  
27 *RDA2*.

28 Mass spectrometry analysis of compounds in the lipid fraction prepared from a  
29 mixture of Pi-Cer D and ceramidase detected a sphingoid base, suggesting that the  
30 sphingoid base derived from Pi-Cer D might be the ligand for *RDA2* (fig. S10). We also  
31 compared the *WRKY33-LUC*-inducing activity of Pi-Cer D analogs, which revealed that  
32 structural differences in the sphingoid base determine the level of induction (fig. S11).  
33 The sphingoid base in Pi-Cer D ((4*E*,8*E*,10*E*)-9-methyl-4,8,10-sphingatrienine,

1 9Me,4E,8E,10E-d19:3) contains a unique branching methyl group at the ninth carbon  
2 position. Remarkably, this 9-methyl-branching structure is present in sphingoid bases of  
3 oomycete, fungi and marine invertebrates, but has not been reported in plants and  
4 mammals (15-17). We thus hypothesized that the 9-methyl-branching structure of the  
5 sphingoid base is decisive in distinguishing between ‘self’ and ‘nonself’ in plants.  
6 Therefore, we investigated the ability of various sphingoid bases to induce a defense  
7 response. Because the sphingoid base in Pi-Cer D (9Me,4E,8E,10E-d19:3) was difficult  
8 to obtain, we used (4E,8E)-9-methyl-4,8-sphingadienine (9Me,4E,8E-d19:2, hereafter  
9 9Me-Spd) to evaluate 9-methyl structure (Fig. 3A). Notably, the *rda2* mutants were  
10 almost insensitive to 9Me-Spd, indicating that 9Me-Spd is specifically recognized by  
11 RDA2 (fig. S12). Among the sphingoid bases we tested, 9Me-Spd showed the strongest  
12 RDA2-dependent elicitor activity (Fig. 3B, 3C, fig. S12 and S13). In addition, (4E,8E)-  
13 4,8-sphingadienine (4E,8E-d18:2, Spd) and sphingosine (4E-d18:1, Sph), neither of  
14 which contain 9-methyl branching, also showed elicitor activity, although this was  
15 significantly weaker than that of 9Me-Spd (Fig. 3C, figs. S12 and S13). To identify the  
16 structural correlates of RDA2-dependent sensing of the sphingoid base, we tested  
17 sphingosine derivatives with different lengths of long-chain bases. Among these  
18 derivatives, Sph (4E-d18:1) induced the highest bioluminescence in the p*WRKY33-LUC*  
19 reporter line, followed by 4E-d16:1, 4E-d14:1, and 4E-d12:1 (fig. S14). This indicates  
20 that efficient sensing by RDA2 requires a long-chain base structure that includes 18  
21 carbon atoms. We also tested phytosphingosine (4-hydroxysphinganine, 4-t18:0, PHS)  
22 and found that it did not elicit bioluminescence in the p*WRKY33-LUC* reporter line. This  
23 indicates that the 4E double-bond structure in Sph is crucial for its sensing by RDA2 (fig.  
24 S15).

25 To further investigate the downstream events following RDA2-mediated sensing, we  
26 tested the ability of 9Me-Spd and its derivatives to activate Arabidopsis immune  
27 responses. The 9Me-Spd activated RDA2-dependent bioluminescence induction,  
28 transcript accumulation of defense-related genes (*FRK1*, *Atlg51890*), phosphorylation of  
29 mitogen-activated protein kinases, and the production of reactive oxygen species (ROS)  
30 more strongly than Spd and Sph (Fig. 3C–F and fig. S12). A protein-lipid overlay assay  
31 using a membrane fraction containing HA-tagged RDA2 demonstrated physical  
32 interaction between 9Me-Spd and RDA2 (Fig. 3G, fig. S16 and S17). Collectively, these

1 results suggest that RDA2 is the receptor for sphingoid bases including 9-methyl  
2 sphingoid base, which is derived from Pi-Cer D.

3 Sphingolipids are major components of eukaryote membranes (16-18). Our findings  
4 revealed that oomycete-derived ceramide is cleaved by plant apoplastic ceramidase and  
5 the generated sphingoid base is recognized by a lectin receptor-like kinase (Fig. 4). This  
6 indicates that plants perceive differences in sphingolipid structure for non-self  
7 recognition. Notably, plant RDA2 senses the 9-methyl-branching structure of sphingoid  
8 bases that are prevalent in oomycetes and fungi. It has recently been reported that *RDA2*  
9 is required for immune signaling and inhibition of ABA signaling by a small synthetic  
10 molecule DFPM as identified by a chemical genetic screen (13). We hypothesize that  
11 DFPM or its metabolized product functions as a mimic of sphingoid base, but further  
12 study is required to clarify this. Based on our results, we propose the name *SphingR* (for  
13 *sphingoid recognizing*) as a synonym of *RDA2* (Fig. 4). Our study here provides a basis  
14 on which to engineer RDA2/SphingR to detect various pathogen-specific lipids and to  
15 enable plants mount defense against pathogens such as *P. infestans*, the causal agent of  
16 the potato late blight that devastated potato crop and caused famine in the nineteenth  
17 century.

## 18 19 **References and Notes:**

- 20 1. F. Boutrot, C. Zipfel, Function, discovery, and exploitation of plant pattern recognition  
21 receptors for broad-spectrum disease resistance. *Annu. Rev. Phytopathol.* **55**, 257-  
22 286 (2017). doi: [10.1146/annurev-phyto-080614-120106](https://doi.org/10.1146/annurev-phyto-080614-120106)
- 23  
24 2. S. Ranf, Sensing of molecular patterns through cell surface immune receptors. *Curr.*  
25 *Opin. Plant Biol.* **38**, 68-77 (2017). doi: [10.1016/j.pbi.2017.04.011](https://doi.org/10.1016/j.pbi.2017.04.011)
- 26  
27 3. D. H. Lee, H. S. Lee, Y. Belkhadir, Coding of plant immune signals by surface  
28 receptors. *Curr. Opin. Plant Biol.* **62**, 102044 (2021). doi:  
29 [10.1016/j.pbi.2021.102044](https://doi.org/10.1016/j.pbi.2021.102044)
- 30  
31 4. D. Tang, G. Wang, J. M. Zhou, Receptor Kinases in Plant-Pathogen Interactions: More  
32 Than Pattern Recognition. *Plant Cell.* **29**, 618-637 (2017). doi: [10.1105/tpc.16.00891](https://doi.org/10.1105/tpc.16.00891)



1  
2  
3  
4  
5  
6  
7  
8  
9  
10  
11  
12  
13  
14  
15  
16  
17  
18  
19  
20  
21  
22  
23  
24  
25  
26  
27  
28  
29  
30  
31  
32  
33

5. A. Kutschera, C. Dawid, N. Gisch, C. Schmid, L. Raasch, T. Gerster, M. Schäffer, E. Smakowska-Luzan, Y. Belkhadir, A. C. Vlot, C. E. Chandler, R. Schellenberger, D. Schwudke, R. K. Ernst, S. Dorey, R. Hückelhoven, T. Hofmann, S. Ranf, Bacterial medium-chain 3-hydroxy fatty acid metabolites trigger immunity in Arabidopsis plants. *Science* **364**, 178-181 (2019). doi: [10.1126/science.aau1279](https://doi.org/10.1126/science.aau1279)

6. Y. A. Hannun, L. M. Obeid, Sphingolipids and their metabolism in physiology and disease. *Nat. Rev. Mol. Cell Biol.* **19**, 175-191 (2018). doi: [10.1038/nrm.2017.107](https://doi.org/10.1038/nrm.2017.107)

7. R. Berkey, D. Bendigeri, S. Xiao, Sphingolipids and plant defense/disease: the "death" connection and beyond. *Front. Plant Sci.* **3**, 68 (2012). doi: [10.3389/fpls.2012.00068](https://doi.org/10.3389/fpls.2012.00068)

8. M. S. Monjil, H. Kato, K. Matsuda, N. Suzuki, S. Tenhiro, T. Suzuki, M. Camagna, A. Tanaka, R. Terauchi, I. Sato, S. Chiba, K. Kawakita, M. Ojika, D. Takemoto, Two structurally different oomycete MAMPs induce distinctive plant immune responses. *BioRxiv* (2021).

9. H. Kato, K. Onai, A. Abe, M. Shimizu, H. Takagi, C. Tateda, H. Utsushi, S. Singkarabanit-Ogawa, S. Kitakura, E. Ono, C. Zipfel, Y. Takano, M. Ishiura, R. Terauchi, Lumi-Map, a real-time Luciferase bioluminescence screen of mutants combined with MutMap, reveal *Arabidopsis* genes involved in PAMP-triggered immunity. *Mol. Plant Microbe Interact.* **33**, 1366-1380 (2020). doi: [10.1094/MPMI-05-20-0118-TA](https://doi.org/10.1094/MPMI-05-20-0118-TA)

10. Z. Zheng, S. A. Qamar, Z. Chen, T. Mengiste, Arabidopsis WRKY33 transcription factor is required for resistance to necrotrophic fungal pathogens. *Plant J.* **48**, 592-605 (2006). doi: [10.1111/j.1365-3113X.2006.02901.x](https://doi.org/10.1111/j.1365-3113X.2006.02901.x)

11. C. Denoux, R. Galletti, N. Mammarella, S. Gopalan, D. Werck, G. De Lorenzo, S. Ferrari, F. M. Ausubel, J. Dewdney, Activation of defense response pathways by OGs and Flg22 elicitors in Arabidopsis seedlings. *Mol. Plant.* **1**, 423-445 (2008). doi: [10.1093/mp/ssn019](https://doi.org/10.1093/mp/ssn019)

1

2 12. A. Abe, S. Kosugi, K. Yoshida, S. Natsume, H. Takagi, H. Kanzaki, H. Matsumura,  
3 K. Yoshida, C. Mitsuoka, M. Tamiru, H. Innan, L. Cano, S. Kamoun, R. Terauchi,  
4 Genome sequencing reveals agronomically important loci in rice using MutMap. *Nat.*  
5 *Biotechnol.* **30**, 174-178 (2012). doi: [10.1038/nbt.2095](https://doi.org/10.1038/nbt.2095)

6

7 13. J. Park, T. H. Kim, Y. Takahashi, R. Schwab, K. Dressano, A. B. Stephan, P. H. O.  
8 Ceciliato, E. Ramirez, V. Garin, A. Huffaker, J. I. Schroeder, Chemical genetic  
9 identification of a lectin receptor kinase that transduces immune responses and  
10 interferes with abscisic acid signaling. *Plant J.* **98**, 492-510 (2019). doi:  
11 [10.1111/tpj.14232](https://doi.org/10.1111/tpj.14232)

12

13 14. A. Zienkiewicz, J. Gömann, S. König, C. Herrfurth, Y. T. Liu, D. Meldau, I. Feussner,  
14 Disruption of Arabidopsis neutral ceramidases 1 and 2 results in specific sphingolipid  
15 imbalances triggering different phytohormone-dependent plant cell death  
16 programmes. *New Phytol.* **226**, 170-188 (2020). doi: [10.1111/nph.16336](https://doi.org/10.1111/nph.16336)

17

18 15. K. Umemura, S. Tanino, T. Nagatsuka, J. Koga, M. Iwata, K. Nagashima, Y.  
19 Amemiya, Cerebroside elicitor confers resistance to fusarium disease in various plant  
20 species. *Phytopathology* **94**, 813-818 (2004). doi: [10.1094/PHYTO.2004.94.8.813](https://doi.org/10.1094/PHYTO.2004.94.8.813)

21

22 16. P. Sperling, E. Heinz, Plant sphingolipids: structural diversity, biosynthesis, first  
23 genes and functions. *Biochim. Biophys. Acta.* **1632**, 1-15 (2003). doi: [10.1016/s1388-](https://doi.org/10.1016/s1388-1981(03)00033-7)  
24 [1981\(03\)00033-7](https://doi.org/10.1016/s1388-1981(03)00033-7)

25

26 17. S. T. Pruett, A. Bushnev, K. Hagedorn, M. Adiga, C. A. Haynes, M. C. Sullards, D.  
27 C. Liotta, A. H. Merrill Jr, Biodiversity of sphingoid bases (“sphingosines”) and  
28 related amino alcohols. *J. Lipid Res.* **49**, 1621-1639 (2008). doi:  
29 [10.1194/jlr.R800012-JLR200](https://doi.org/10.1194/jlr.R800012-JLR200)

30

31 18. H. Imai, Y. Morimoto, K. Tamura, Sphingoid base composition of  
32 monoglucosylceramide in Brassicaceae. *J. Plant Physiol.* **157**, 453-456 (2000).  
33 [doi.org/10.1016/S0176-1617\(00\)80031-0](https://doi.org/10.1016/S0176-1617(00)80031-0)



1

2 **Acknowledgments:** We thank H. Utsushi, E. Kanzaki, K. Ito, E. Sato (in IBRC) and Y.  
3 Inoue (in Kyoto university) for technical support. Computational analysis was partially  
4 performed on the NIG supercomputer at the ROIS National Institute of Genetics.

5 **Funding:** This work was supported by the Japan Society for the Promotion of Science  
6 KAKENHI grants (20K15528, H.K.; 15H05779 and 20H00421, R.T.; 20H02995, S.A.;  
7 17H06172, K.S.; 21K19112 and 21H05032, Y.T.; 17H03963, K.K; 20H02985, D.T.).

8 **Author contributions:** H.K., D.T., Y.T., K.S., and R.T. conceived this study. H.K.  
9 performed main experiments and data analyses. M.S. and A.A. performed MutMap  
10 analysis. D.T., K.K., and M.O. purified and provided Pi-Cer D and performed HPLC  
11 analysis. K.O. and M.I. developed the bioluminescence monitoring system. S.A. and K.S.  
12 performed inoculation assays. K.N, N.I, T.D., and K.S. performed protein expression and  
13 binding assays. H.K. drafted the manuscript. H.K., D.T., Y.T. K.S., and R.T. wrote the  
14 manuscript.

15 **Competing interests:** The authors declare no conflicts of interest in relation to this work.

16 **Data and materials availability:** All data are available in the main text or supplementary  
17 materials.

## 18 **Supplementary Materials:**

19 Materials and Methods

20 Figures S1 – S17

21 Tables S1 – S6

22 References (19 – 26)

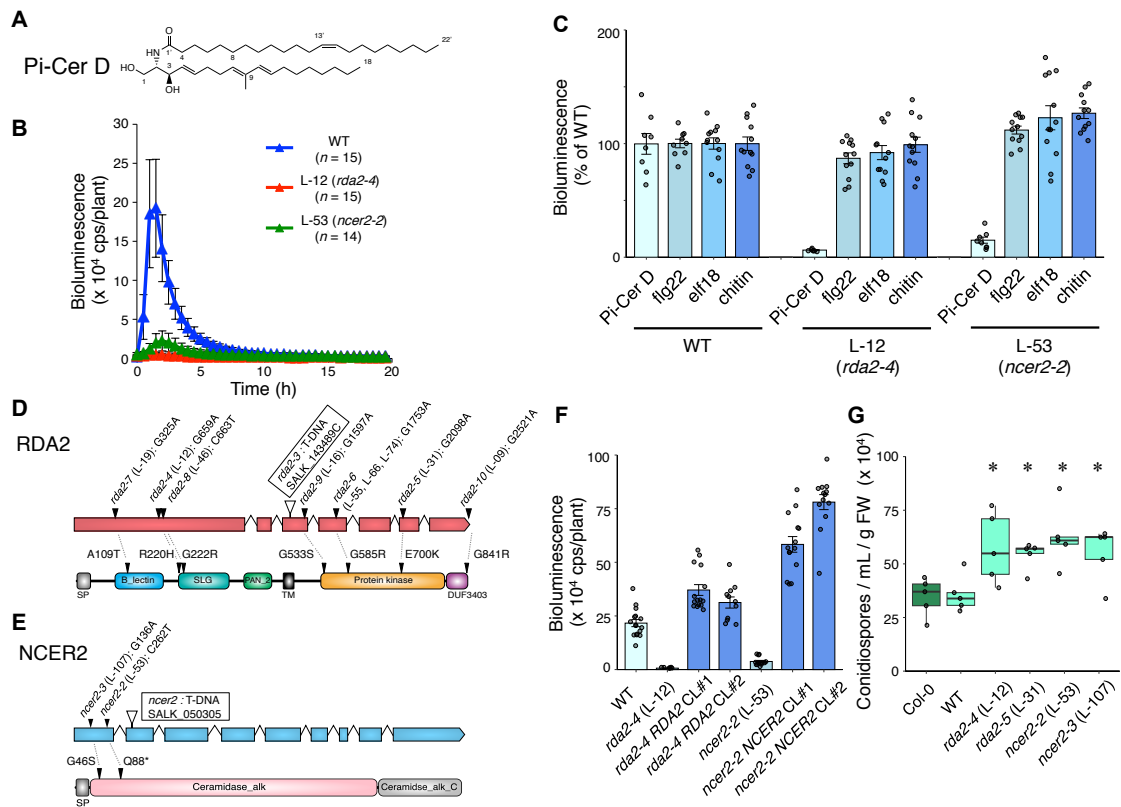

**Fig. 1. Arabidopsis *RDA2* and *NCER2* are required for recognition of Pi-Cer D and resistance against *Hyaloperonospora arabidopsidis*** (A) Chemical structure of Pi-Cer D. (B) Bioluminescence response over time of Arabidopsis p*WRKY33-LUC* reporter (WT), *rda2-4*, and *ncer2-2* after Pi-Cer D (0.17 μM) treatment (means ± SD). For additional data, see fig. S3. (C) Bioluminescence of WT and mutant seedlings after treatment with Pi-Cer D, flg22, elf18, or chitin. Relative peak bioluminescence values are shown as % of WT (means ± SE). For additional data, see fig. S4. (D and E) Gene and protein structures of *RDA2* (D) and *NCER2* (E). Gene structure (top), showing exons in boxes and introns as lines between the boxes. Protein structure (bottom), showing the different domains. The positions of the EMS-induced point mutations in different alleles (closed triangle) and T-DNA insertion sites (opened triangle) are indicated. (F) Complementation of *rda2* and *ncer2* mutants with wild-type alleles. Bioluminescence (means ± SE) of WT, *rda2-4*, *ncer2-2*, and complemented lines (CL) after Pi-Cer D (0.17 μM) treatment is shown. For additional data, see fig. S6. (G) Growth of *Hyaloperonospora arabidopsidis* on Arabidopsis Col-0, WT, and *rda2* and *ncer2* mutants. Three-week-old Arabidopsis plants were inoculated with *Hpa* Waco9. Conidiospores were harvested and counted 5 days post inoculation ( $n = 5$ ). \*,  $p < 0.05$  in two-tailed  $t$ -tests comparing the corresponding values from Col-0. Experiments were performed three times with similar results.

1  
2  
3  
4  
5  
6  
7  
8  
9  
10  
11  
12  
13  
14  
15  
16  
17  
18  
19  
20

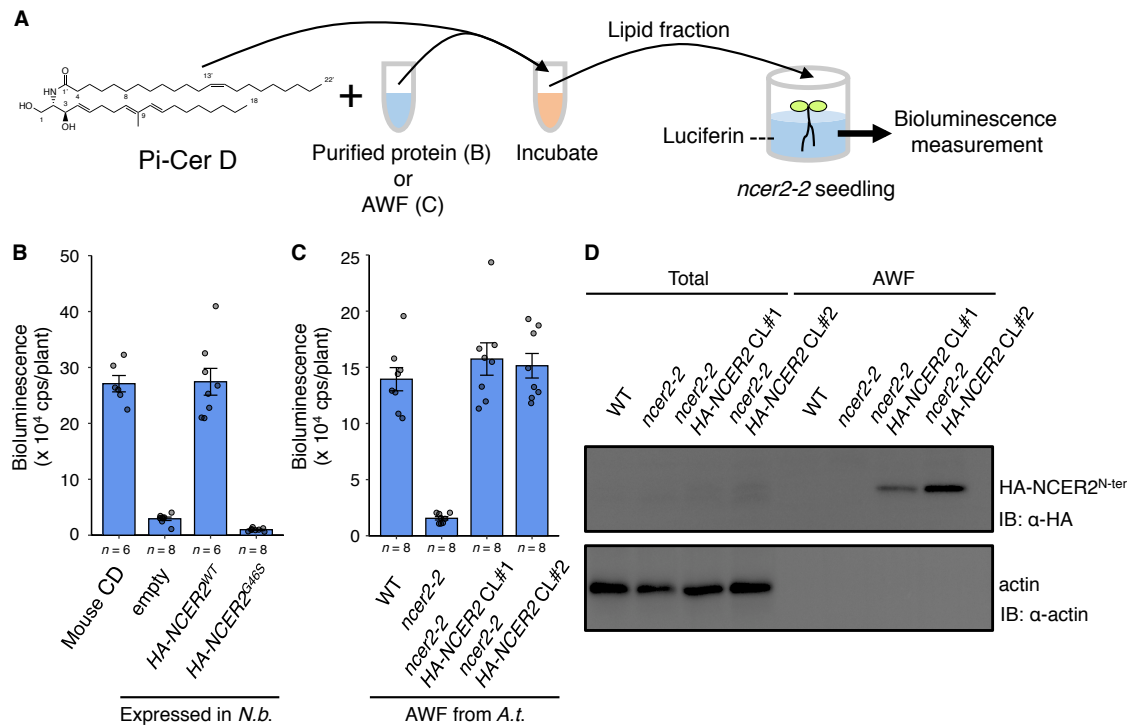

1

2 **Fig. 2. Pi-Cer D is cleaved by NCER2, an apoplastic ceramidase.** (A) Pi-Cer D-  
 3 cleavage assay. Pi-Cer D was incubated for 24 h with HA-NCER2, its mutant variant  
 4 produced in *Nicotiana benthamiana* leaves, or apoplast wash fluid (AWF) from  
 5 Arabidopsis plants. The lipid fraction containing metabolites derived from Pi-Cer D was  
 6 recovered and applied to *ncer2-2* plants, and their bioluminescence was measured. (B)  
 7 Pi-Cer D is cleaved by the Arabidopsis ceramidase NCER2. HA-tagged wild-type (HA-  
 8 NCER2<sup>WT</sup>) and mutated NCER2 (HA-NCER2<sup>G46S</sup>, carrying the same mutation as in the  
 9 L-107 line) were transiently expressed in *N. benthamiana* (*N.b.*) and purified.  
 10 Commercial mouse ceramidase (Mouse CD) served as a positive control. Peak  
 11 bioluminescence is shown (means ± SE). For additional data for NCER2 expressed in *N.*  
 12 *benthamiana*, see fig. S8. (C) Pi-Cer D-cleavage activity of Arabidopsis (*A.t.*) AWF.  
 13 AWFs were isolated from the pWRKY33-LUC reporter line (WT), *ncer2-2* and the *ncer2-2*  
 14 HA-NCER2 complementation lines (CL). Peak bioluminescence is shown (means ± SE).  
 15 For additional data with *ncer2-2* HA-NCER2 plants, see fig. S9. (D) Immunoblot analysis  
 16 of total protein and AWF extracted from WT, *ncer2-2* and *ncer2-2* HA-NCER2 plants.  
 17 Anti-actin antibody was used to detect cytosolic protein. Experiments were performed  
 18 three times with similar results.

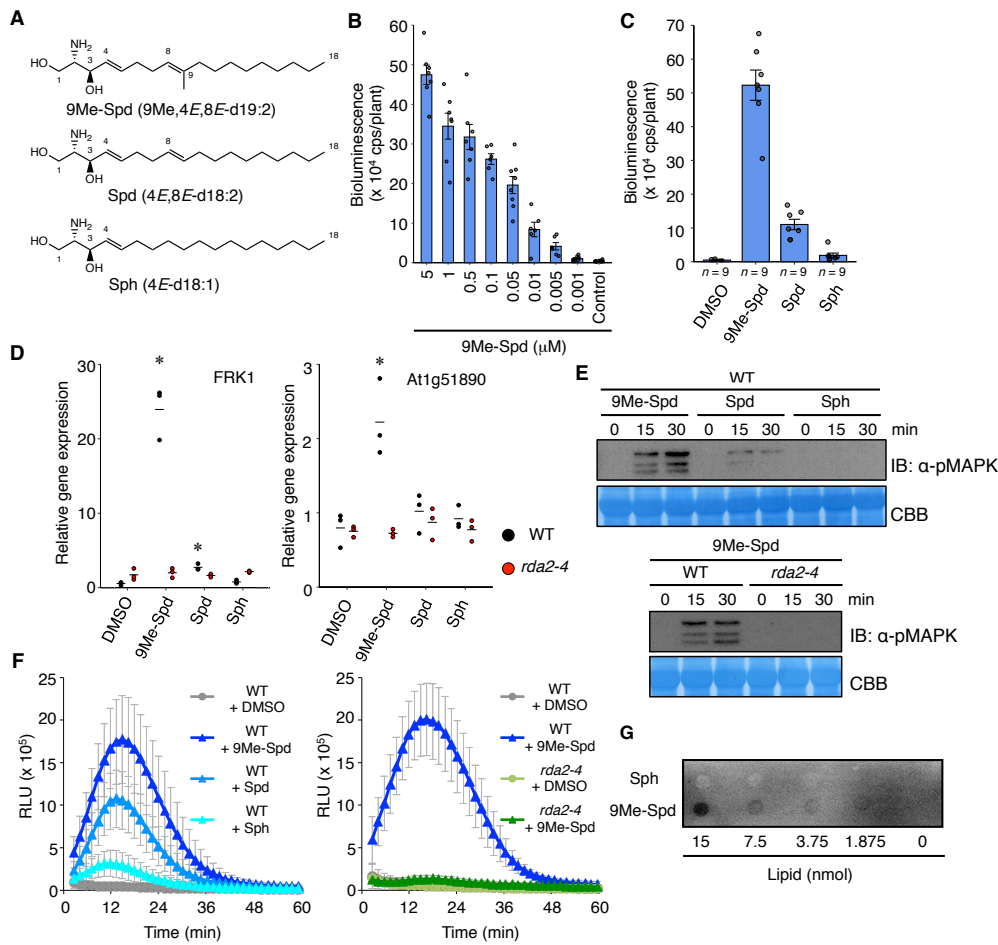

1

2 **Fig. 3. RDA2 recognizes 9-methyl sphingoid base and induces defense responses.** (A)  
 3 Structures of (4E,8E)-9-methyl-4,8-sphingadienine (9Me-Spd), (4E,8E)-4,8-  
 4 sphingadienine (Spd), and sphingosine (Sph). (B and C) Peak bioluminescence values for  
 5 Arabidopsis *pWRKY33-LUC* reporter seedlings (WT) treated with (B) different  
 6 concentrations of 9Me-Spd or (C) 0.5 μM of structurally different sphingoid bases (means  
 7 ± SE). For additional data, see fig. S12 and S13. (D) Expression of defense genes (*FRK1*  
 8 and *At1g51890*) in Arabidopsis seedlings 3 h after elicitation with sphingoid bases (0.5  
 9 μM) relative to expression in DMSO-treated WT. Individual data (symbols) and means  
 10 (bars) are shown (*n* = 3); \*, *p* < 0.05 (two-tailed *t*-test). (E) Mitogen-activated protein  
 11 kinase (MAPK) activation following treatment with sphingoid base (0.5 μM).  
 12 Phosphorylated MAPKs were visualized with anti-phospho-p44/p42 MAPK antibody.  
 13 (F) ROS accumulation in Arabidopsis leaves treated with sphingoid bases. Left, leaf disks  
 14 from WT plants treated with 30 μM 9Me-Spd, Spd, or Sph (*n* = 12). Right, leaf disks  
 15 from WT and *rda2-4* plants treated with 30 μM 9Me-Spd (*n* = 10). Relative light unit  
 16 (RLU) is shown (means ± SD). (G) Binding of sphingoid bases with HA-tagged RDA2  
 17 by protein-lipid overlay assay. For additional data, see fig. S16 and S17. Experiments  
 18 were performed two (B, D, and F) or three times (C, E, and G) with similar results.

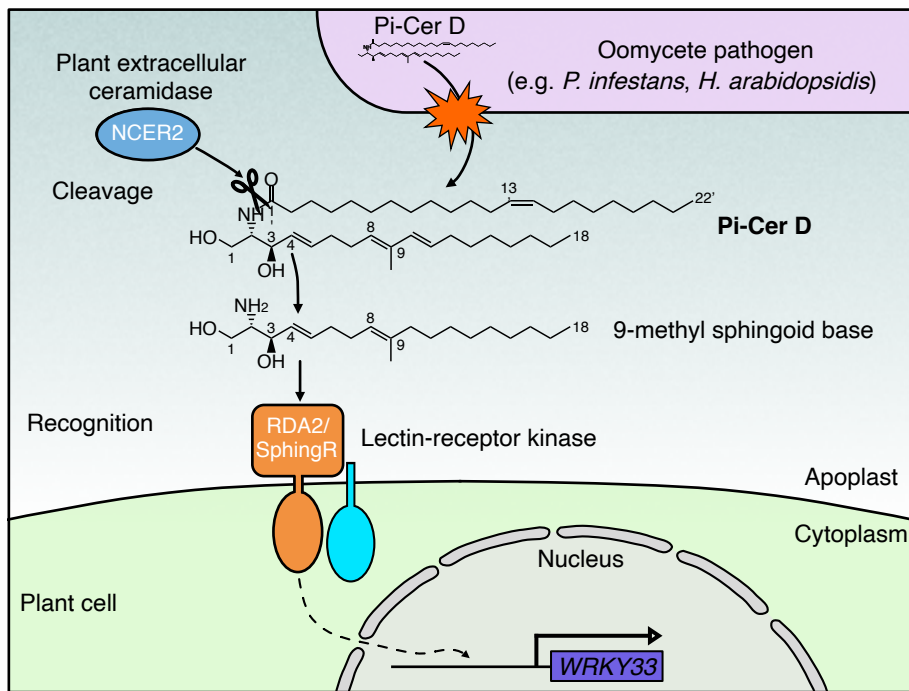

1

2 **Fig. 4. A model for the recognition of pathogen-derived ceramide in plants.** Pi-Cer D  
 3 is cleaved by plant apoplastic ceramidase NCER2 into 9-methyl sphingoid base. 9-methyl  
 4 sphingoid base is recognized by a lectin-receptor kinase, RDA2/SphingR, which then  
 5 induces defense responses that include *WRKY33* gene expression and enhances immunity  
 6 against pathogen infection.

7

8
